# Supplementary material
Source: PubMed Central journal article supplement (PMC6712982)
Supplement: NIHMS1530119-supplement-401_2019_2027_MOESM1_ESM.pdf [file NIHMS1530119-supplement-401_2019_2027_MOESM1_ESM.pdf]

## Online Resource 1

### ALK-Positive Histiocytosis with *KIF5B-ALK* Fusion in the Central Nervous System

Calixto-Hope G. Lucas, Ahmed Gilani, David A. Solomon, Xiayuan Liang, Ossama M. Maher, Gabriel Chamyan, Bette K. Kleinschmidt-Demasters, Arie Perry

Contents:

**Supplementary Table 1.** *KIF5B-ALK* gene fusion coordinates.

**Supplementary Figure 1.** Snapshots from the Integrated Genome Viewer over the fusion breakpoints in *KIF5B* and *ALK* from case 2.

**Supplementary Table 1.** *KIF5B*-*ALK* gene fusion coordinates.

| Tumor ID | Structural variant | Fusion type | N-terminal gene |            |                     |               |             |                   | C-terminal gene |            |                     |               |             |                   |
|----------|--------------------|-------------|-----------------|------------|---------------------|---------------|-------------|-------------------|-----------------|------------|---------------------|---------------|-------------|-------------------|
|          |                    |             | Gene            | Chromosome | Breakpoint position | Transcript ID | Fused exons | Fused amino acids | Gene            | Chromosome | Breakpoint position | Transcript ID | Fused exons | Fused amino acids |
| case 1   | translocation      | in-frame    | KIF5B           | chr10      | g.32,306,071        | NM_004521     | 1-24        | 1-920             | ALK             | chr2       | g.29,446,394        | NM_004304     | 20-29       | 1059-1620         |
| case 2   | translocation      | in-frame    | KIF5B           | chr10      | g.32,305,017        | NM_004521     | 1-24        | 1-920             | ALK             | chr2       | g.29,446,555        | NM_004304     | 20-29       | 1059-1620         |

Fusion breakpoint within intron 24-25 resulting in fusion of exons 1-24 (codons 1-920) of *KIF5B* (RefSeq transcript NM\_004521)

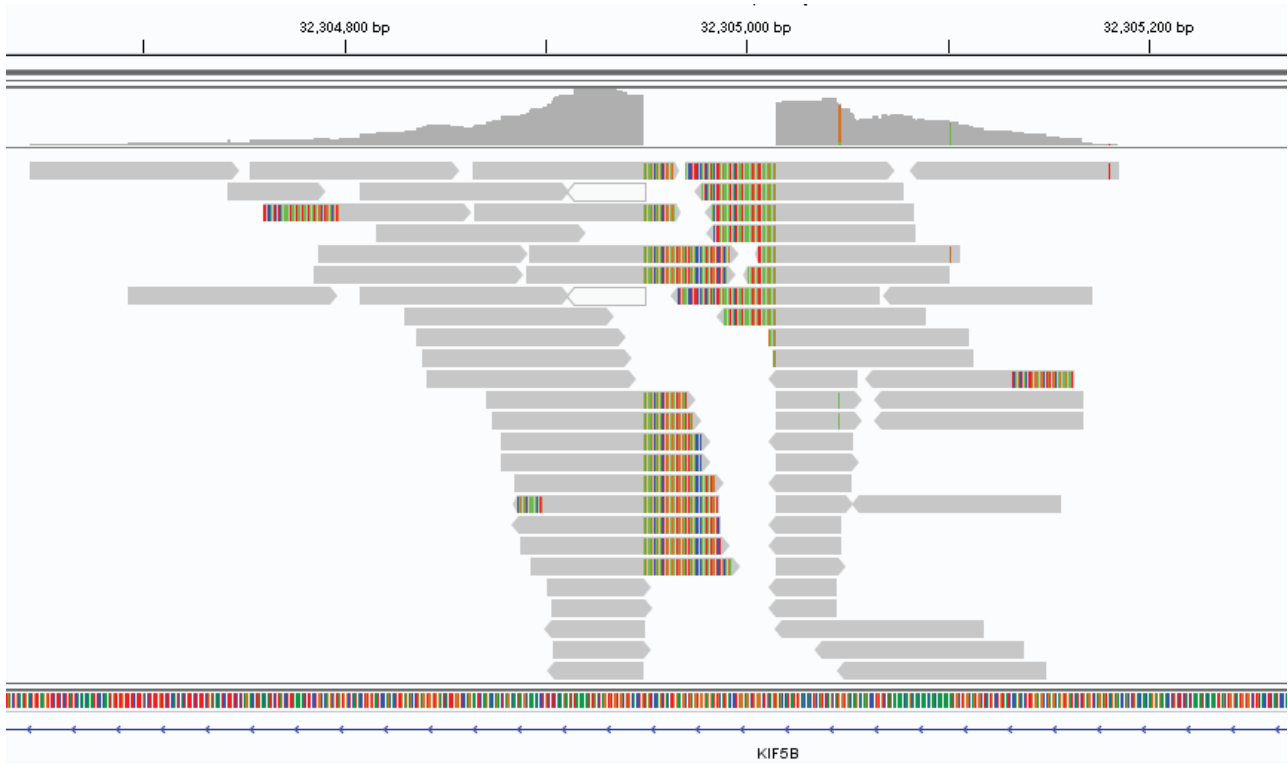

Fusion breakpoint within intron 19-20 resulting in fusion of exons 20-29 (codons 1059-1620) of *ALK* (RefSeq transcript NM\_004304)

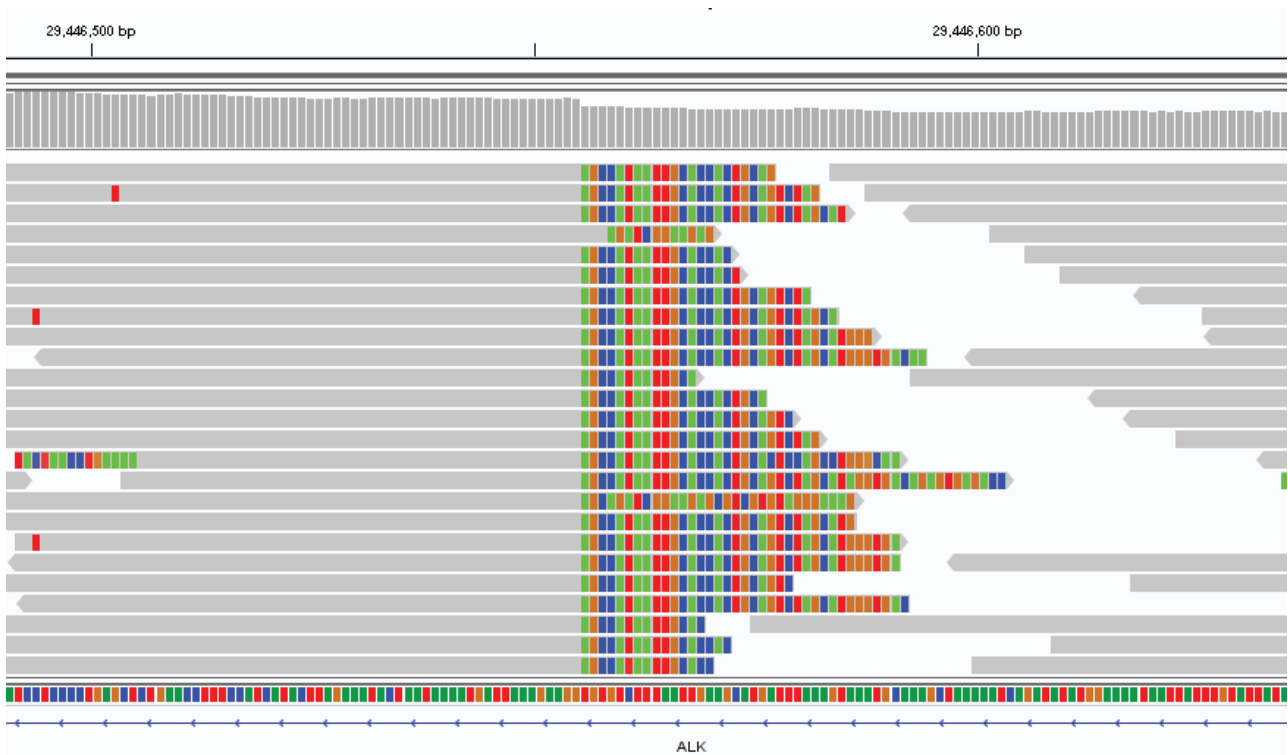

**Supplementary Figure 1.** Snapshots from the Integrated Genome Viewer over the fusion breakpoints in *KIF5B* and *ALK* from case 2.
